# Supplementary material
Source: PubMed Central journal article supplement (PMC4126164)
Supplement: NIHMS598422-supplement-supplement_1.pdf [file NIHMS598422-supplement-supplement_1.pdf]

## SUPPLEMENTAL DIGITAL CONTENT

**SDC Table 1.** Demographics and vision characteristics of central vision loss (CVL) patients without a scotoma, age-matched CVL patients with a scotoma, and age-matched normally-sighted controls

|                                     | Central Vision Loss      |             |             | Test Statistic     | df   | p-value             |
|-------------------------------------|--------------------------|-------------|-------------|--------------------|------|---------------------|
|                                     | Normally-Sighted         | Scotoma     | Nonscotoma  |                    |      |                     |
|                                     | (n = 14)                 | (n = 7)     | (n = 7)     |                    |      |                     |
|                                     | Mean (SD)                | Mean (SD)   | Mean (SD)   |                    |      |                     |
| <b>Demographics</b>                 |                          |             |             |                    |      |                     |
| Age (years)                         | 52.6 (12.9)              | 53.4 (10.3) | 48.8 (16.8) | 0.47 <sup>b</sup>  | 2,25 | 0.78                |
| Gender, Male (%)                    | 71%                      | 43%         | 57%         | 1.64 <sup>c</sup>  | 2    | 0.44                |
| Length of Vision Impairment (years) | -                        | 33.3 (17.8) | 39.3 (15.8) | 0.69 <sup>d</sup>  | 12   | 0.50                |
| <b>Vision Measures</b>              |                          |             |             |                    |      |                     |
| Visual Acuity (logMAR) ↓            | 0.02 (0.06)              | 0.73 (0.20) | 0.60 (0.21) | 65.01 <sup>b</sup> | 2,25 | <0.001 <sup>e</sup> |
| Contrast Sensitivity (log units) ↑  | 1.92 (0.12) <sup>a</sup> | 1.34 (0.22) | 1.63 (0.37) | 14.41 <sup>b</sup> | 2,24 | <0.001 <sup>e</sup> |

All tests were performed binocularly.

<sup>a</sup>n = 13

<sup>b</sup>F-value

<sup>c</sup>χ<sup>2</sup> value

<sup>d</sup>t-value

<sup>e</sup>Normally-sighted group had significantly better visual acuity and contrast sensitivity than the CVL groups; see Supplementary Table 2 for comparison of the two CVL groups.

↑ Higher scores indicate better performance.

↓ Lower scores indicate better performance.

**SDC Table 2.** Results of independent t-tests comparing demographics and vision characteristics of central vision loss (CVL) patients without a scotoma ( $n = 7$ ) and age-matched CVL patients with a scotoma ( $n = 7$ ).

|                                    | Scotoma                 | Nonscotoma              | <i>t</i>          | <i>df</i> | <i>p</i> -value |
|------------------------------------|-------------------------|-------------------------|-------------------|-----------|-----------------|
|                                    | Mean ( <i>SD</i> ) or % | Mean ( <i>SD</i> ) or % |                   |           |                 |
| <b>Demographics</b>                |                         |                         |                   |           |                 |
| Age (years)                        | 53.4<br>(10.3)          | 48.8<br>(16.8)          | -0.60             | 12        | 0.56            |
| Gender, Male                       | 43%                     | 57%                     | 0.29 <sup>a</sup> | 1         | 0.59            |
| Length of Impairment (years)       | 33.3<br>(17.8)          | 39.3<br>(15.8)          | 0.69              | 12        | 0.50            |
| <b>Vision Measures</b>             |                         |                         |                   |           |                 |
| Visual Acuity (logMAR) ↓           | 0.73<br>(0.20)          | 0.60<br>(0.21)          | -1.11             | 12        | 0.29            |
| Contrast Sensitivity (log units) ↑ | 1.34<br>(0.22)          | 1.63<br>(0.37)          | 1.75              | 12        | 0.11            |

All tests were performed binocularly. CVL in the nonscotoma group was caused by albinism ( $n = 3$ ), infantile nystagmus ( $n = 2$ ), retinopathy of prematurity ( $n = 1$ ) and multifocal choroiditis ( $n = 1$ ). CVL in the age-matched scotoma group was caused by juvenile macular dystrophy ( $n = 3$ ), myopic degeneration ( $n = 2$ ), Doyme honeycomb retinal dystrophy ( $n = 1$ ), and optic neuropathy ( $n = 1$ ).

<sup>a</sup> Chi-square test

↑ Higher scores indicate better performance

↓ Lower scores indicate better performance

**SDC Table 3.** Analysis of variance for centering gaze perception task measures with age-matched vision groups.

| Source                           | Horizontal Plane |          |                 | Vertical Plane |                 |
|----------------------------------|------------------|----------|-----------------|----------------|-----------------|
|                                  | <i>df</i>        | <i>F</i> | <i>p</i> -value | <i>F</i>       | <i>p</i> -value |
| Straight Ahead Gaze Judgments    |                  |          |                 |                |                 |
| Vision Group (V)                 | 2                | 2.41     | 0.11            | 0.57           | 0.57            |
| V within-group error             | 25               | (4.96)   |                 | (17.34)        |                 |
| Virtual Head Rotation (HR)       | 2                | 19.25    | <0.001          | 57.4           | < 0.001         |
| HR x V                           | 4                | 3.24     | 0.02            | 0.28           | 0.89            |
| HR within-group error            | 50               | (8.71)   |                 | (13.24)        |                 |
| SD Straight Ahead Gaze Judgments |                  |          |                 |                |                 |
| Vision Group (V)                 | 2                | 8.24     | 0.002           | 17.04          | <0.001          |
| V within-group error             | 25               | (17.07)  |                 | (11.87)        |                 |
| Virtual Head Rotation (HR)       | 2                | 0.04     | 0.96            | 1.61           | 0.21            |
| HR x V                           | 4                | 2.73     | 0.04            | 1.01           | 0.41            |
| HR within-group error            | 50               | (2.60)   |                 | (1.93)         |                 |

Values enclosed in parentheses represent mean square errors. *SD* = standard deviation (variability) of gaze perception task measures.

**SDC Table 4.** Analysis of variance for decentering gaze perception task measures with age-matched vision groups.

| Source                    | <i>df</i> | <i>F</i> | <i>p</i> -value |
|---------------------------|-----------|----------|-----------------|
| <b>Gaze Cone Width</b>    |           |          |                 |
| Vision Group (V)          | 2         | 2.78     | 0.08            |
| V within-group error      | 24        | (204.30) |                 |
| Spatial Plane (S)         | 1         | 4.26     | 0.05            |
| S x V                     | 2         | 1.41     | 0.26            |
| S within-group error      | 24        | (49.22)  |                 |
| <b>SD Gaze Cone Width</b> |           |          |                 |
| Vision Group (V)          | 2         | 4.63     | 0.02            |
| V within-group error      | 24        | (46.57)  |                 |
| Spatial Plane (S)         | 1         | 3.16     | 0.09            |
| S x V                     | 2         | 1.00     | 0.39            |
| S within-group error      | 24        | (11.02)  |                 |

Values enclosed in parentheses represent mean square errors. *SD* = standard deviation (variability) of gaze perception task measures
